# Supplementary material for: Kisspeptin-54 triggers egg maturation in women undergoing in vitro fertilization
Source: JCI journal article supplement (doi:10.1172/jci75730), 2014-07-17
Supplement: sd1 [file 1]

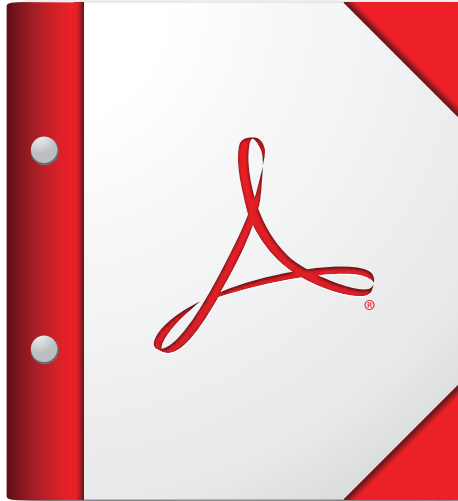

**For the best experience, open this PDF portfolio in  
Acrobat X or Adobe Reader X, or later.**

**Get Adobe Reader Now!**
